# Supplementary material
Source: HighWire-hosted journal article supplement (http://ajnr-stage2.highwire.org/highwire/filestream/107897/field_highwire_adjunct_files/0/0977.pdf)
Supplement: 0977.pdf [file 0977.pdf]

**Table S1. Clinical and imaging features of MMD patients**

| Characteristics              | MMD Hemispheres (n = 107) * |
|------------------------------|-----------------------------|
| Demographic features**       |                             |
| Age (y)                      | 40.0 ± 13.1                 |
| Women (%)                    | 35 (58.3)                   |
| Hypertension (%)             | 9 (15.0)                    |
| Diabetes mellitus (%)        | 6 (10.0)                    |
| Dyslipidemia (%)             | 12 (20.0)                   |
| History of smoking (%)       | 9 (15.0)                    |
| Imaging features             |                             |
| Modified brain frailty score |                             |
| Score 0 (%)                  | 18 (16.8)                   |
| Score 1 (%)                  | 50 (46.7)                   |
| Score 2 (%)                  | 31 (29.0)                   |
| Score 3 (%)                  | 6 (5.6)                     |
| Score 4 (%)                  | 2 (1.9)                     |
| Periventricular WMH          |                             |
| Fazakes grade 0 (%)          | 13 (12.1)                   |
| Fazakes grade 1 (%)          | 59 (55.1)                   |
| Fazakes grade 2 (%)          | 24 (22.4)                   |
| Fazakes grade 3 (%)          | 11 (10.3)                   |
| Deep WMH                     |                             |
| Fazakes grade 0 (%)          | 24 (22.4)                   |
| Fazakes grade 1 (%)          | 78 (72.9)                   |

|                                           |             |
|-------------------------------------------|-------------|
| Fazakes grade 2 (%)                       | 1 (0.9)     |
| Fazakes grade 3 (%)                       | 4 (3.7)     |
| Basal ganglia EPVS                        |             |
| Grade 0 (%)                               | 0 (0)       |
| Grade 1 (%)                               | 31 (29)     |
| Grade 2 (%)                               | 71 (66.4)   |
| Grade 3 (%)                               | 5 (4.7)     |
| Grade 4 (%)                               | 0 (0)       |
| Vascular lesion presence (%) <sup>†</sup> | 48 (44.9)   |
| CMB presence (%)                          | 11 (10.3)   |
| Cerebral perfusion                        |             |
| CBF <sub>mca</sub> (mL/100g/min)          | 43.2 ± 11.6 |
| CBF <sub>cerebellum</sub> (mL/100g/min)   | 45.6 ± 9.5  |
| rCBF <sub>mca</sub>                       | 0.9 ± 0.2   |

---

$rCBF_{mca} = CBF_{mca}/CBF_{cerebellum}$ , MMD = Moyamoya disease, CBF = cerebral blood flow, WMH = white matter hyperintensity, EPVS = enlargement of periventricular space, CMB = cerebral microbleed.

\* This study included 60 patients (13 unilateral and 47 bilateral cases, for a total of 107 hemispheres).

\*\* Demographic features were calculated patient-wise, not hemisphere-wise.

† There were 31 (64.7%) hemispheres showed lacunar infarction lesions out of all vascular lesions.
